# Supplementary material for: Porous ceria materials for efficient direct conversion of carbon dioxide and methanol to dimethyl carbonate
Source: Royal Society of Chemistry journal article supplement (doi:10.1039/d4ma00629a), 2024-01-01
Supplement: d4ma00629a1.pdf [file d4ma00629a1.pdf]

## ***Electronic Supplementary Information (ESI)***

# **Porous ceria materials for efficient direct conversion of carbon dioxide and methanol to dimethyl carbonate**

Zhuxian Yang,<sup>a</sup> Justin Tay Zheng,<sup>b</sup> Xinhuan Lu,<sup>c</sup> Monica Mengdie Lin,<sup>b</sup> Dongming Cai,<sup>d</sup>  
Yankun Wang,<sup>a</sup> Wen-Yueh Yu,<sup>\*b</sup> Yanqiu Zhu<sup>a</sup> and Yongde Xia<sup>\*a</sup>

<sup>a</sup> *Department of Engineering, Faculty of Environment, Science and Economy, University of Exeter, Exeter, EX4 4QF, United Kingdom. E-mail: [y.xia@exeter.ac.uk](mailto:y.xia@exeter.ac.uk)*

<sup>b</sup> *Department of Chemical Engineering, National Taiwan University, No.1, Sec. 4 Roosevelt Rd. Taipei, Taiwan, 106335 Taiwan. E-mail: [wenyueh@ntu.edu.tw](mailto:wenyueh@ntu.edu.tw)*

<sup>c</sup> *School of Chemical Engineering, Hubei University, 368 Youyi Dadao, Wuchang Qu, Wuhan, Hubei Province, 430062, P. R. China*

<sup>d</sup> *Hubei Key Laboratory of Energy Storage and Power Battery, School of Mathematics, Physics and Optoelectronics Engineering, Hubei University of Automotive Technology Shiyan, 442002, P. R. China*

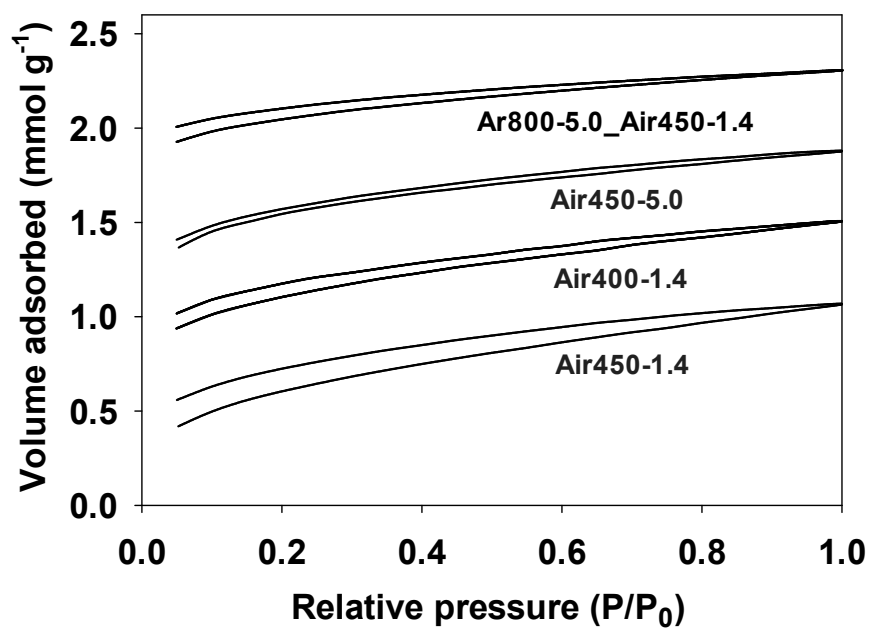

**Fig. S1** CO<sub>2</sub> adsorption isotherms at 25 °C of CeO<sub>2</sub> samples prepared under various calcination conditions which are indicated in their names. The isotherms are offset by 0.55 for Air400-1.4, 1.0 for Air450-5.0 and 1.7 for Ar800-5.0\_Air450-1.4.
